# Supplementary material for: CD44 facilitates adhesive interactions in airineme-mediated intercellular signaling
Source: PubMed Central journal article supplement — bioRxiv. 2025 Aug 13:2024.02.27.582398. Preprint. [Version 6] doi: 10.1101/2024.02.27.582398 (PMC10925269; doi:10.1101/2024.02.27.582398), 2025-08-13
Supplement: media-1.pdf [file media-1.pdf]

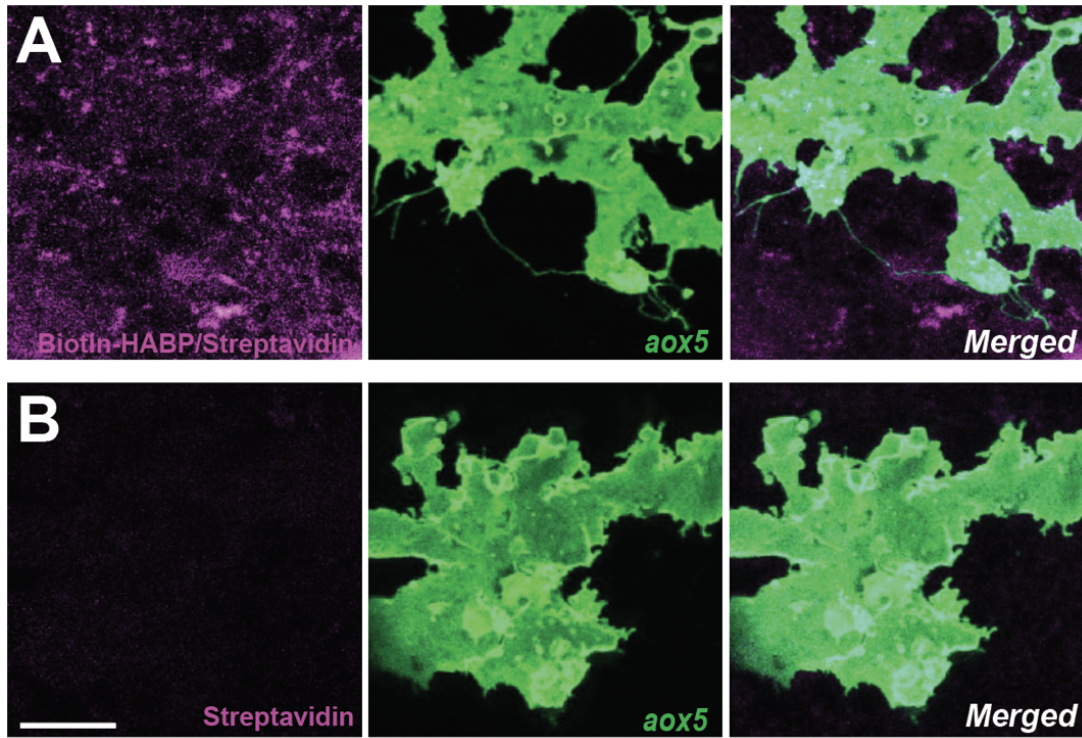

**Figure S1. Lack of apparent Hyaluronic acid binding protein (HABP) expression in xanthoblasts**  
(A) Xanthoblasts appear to show no overlapping expression when traced using Biotin-conjugated HABP and Alexa-546-labelled streptavidin. (B) A control experiment with Alexa-546 streptavidin alone did not result in any detectable signal. Scale bar represents 20 $\mu$ m.

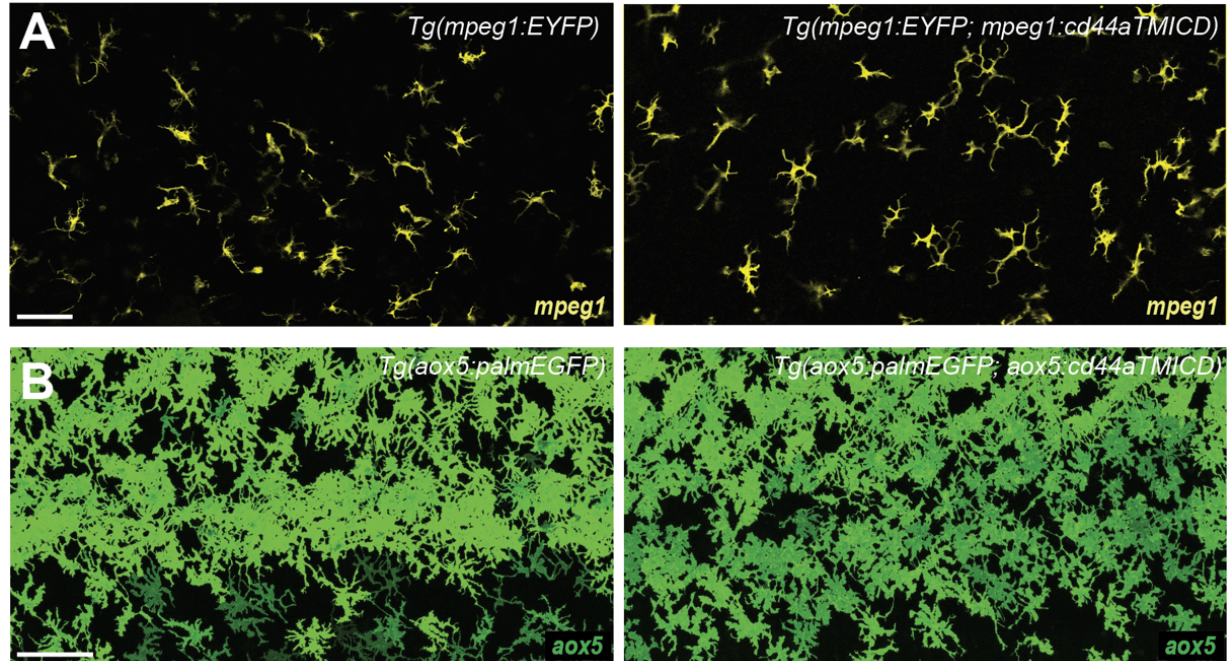

**Figure S2. Overexpression of *cd44a*TMICD does not alter cell survival or behavior**

(A) Macrophages, labelled with an *mpeg1* promoter driving membrane YFP, display no difference in cell count or morphology when compared to cells with overexpressed *cd44a*TMICD under the *mpeg1* promoter. (B) Similarly, there is no noticeable change in appearance of xanthophore lineages overexpressing *cd44a*TMICD when compared to control fish. Scale bars represent 20 $\mu$ m (A, B).

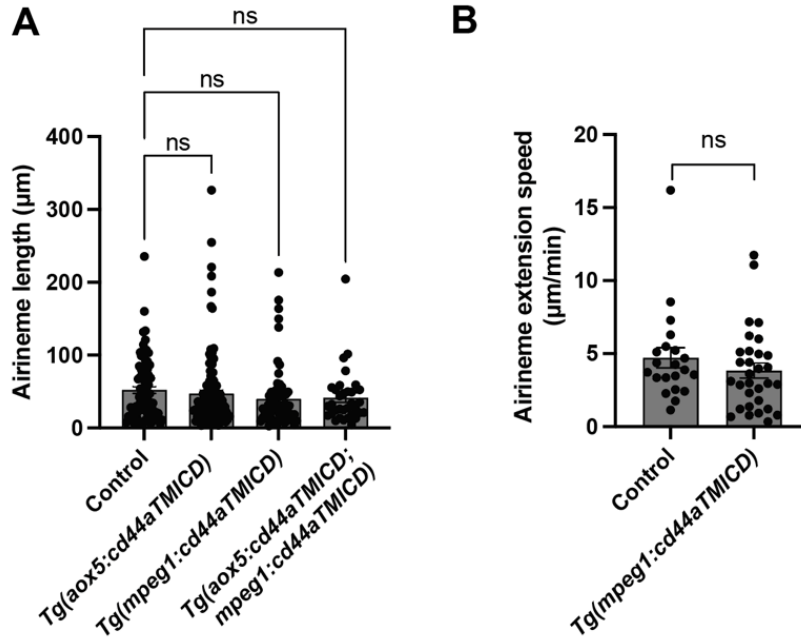

**Figure S3. Airineme length and speed remained consistent despite CD44a manipulations**

(A) There was no significant difference in airineme length in embryos where *cd44a*TMICD was overexpressed either in xanthophore-lineages, macrophages, or in both concurrently, ( $F_{(3, 288)}=1.020$ ,  $P=0.3843$ ). (B) There was no statistically significant difference in airineme extension speed in embryos overexpressing *cd44a*TMICD in macrophages,  $P=0.2968$ , 3 embryos each. Statistical significance was assessed using a One-way ANOVA, followed by a Tukey's HSD post hoc test or a Student's t test. Error bars indicate mean  $\pm$  SEM.
